# Supplementary material for: Nagashima-Type Palmoplantar Keratosis: Clinical Characteristics, Genetic Characterization, and Clinical Management
Source: Biomed Res Int. 2021 Jan 27;2021:8841994. doi: 10.1155/2021/8841994 (PMC7861918; doi:10.1155/2021/8841994)
Supplement: Supplementary Materials — Supplement, Table 1: Clinical phenotypes in individuals with NPPK. Supplement, Table 2: SERPINB7 mutations in individuals with NPPK. [file 8841994.f1.zip]

Archive with 2 entries (2 files):
- Supplement-Table 1 (1).docx
- Supplement-Table 2 (1).docx
